# Supplementary material for: Glutathione-Responsive Tannic Acid-Assisted FRET Nanomedicine for Cancer Therapy
Source: MDPI journal article supplement (doi:10.3390/pharmaceutics15051326), 2023-04-24
Supplement: s1 [file s1]

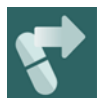

---

Supplementary Information

**Glutathione-responsive tannic acid-assisted FRET nanomedicine for cancer therapy**

**Partha Laskar<sup>1,2,3</sup>, Anupam Dhasmana<sup>1,2,4</sup>, Sudhir Kotnala<sup>1,2</sup>, Meena Jaggi<sup>1,2</sup>, Murali M. Yallapu<sup>1,2\*</sup> and Subhash C. Chauhan<sup>1,2\*</sup>**

<sup>1</sup>Department of Immunology and Microbiology, School of Medicine, University of Texas Rio Grande Valley, McAllen, TX 78504, USA

<sup>2</sup>South Texas Center of Excellence in Cancer Research, School of Medicine, University of Texas Rio Grande Valley, McAllen, TX 78504, USA

<sup>3</sup>Macromolecular Chemistry, Department of Chemistry, The Ångström Laboratory, Uppsala University, Sweden

<sup>4</sup>Himalayan School of Biosciences and Cancer Research Institute, Swami Rama Himalayan University, Dehradun, India

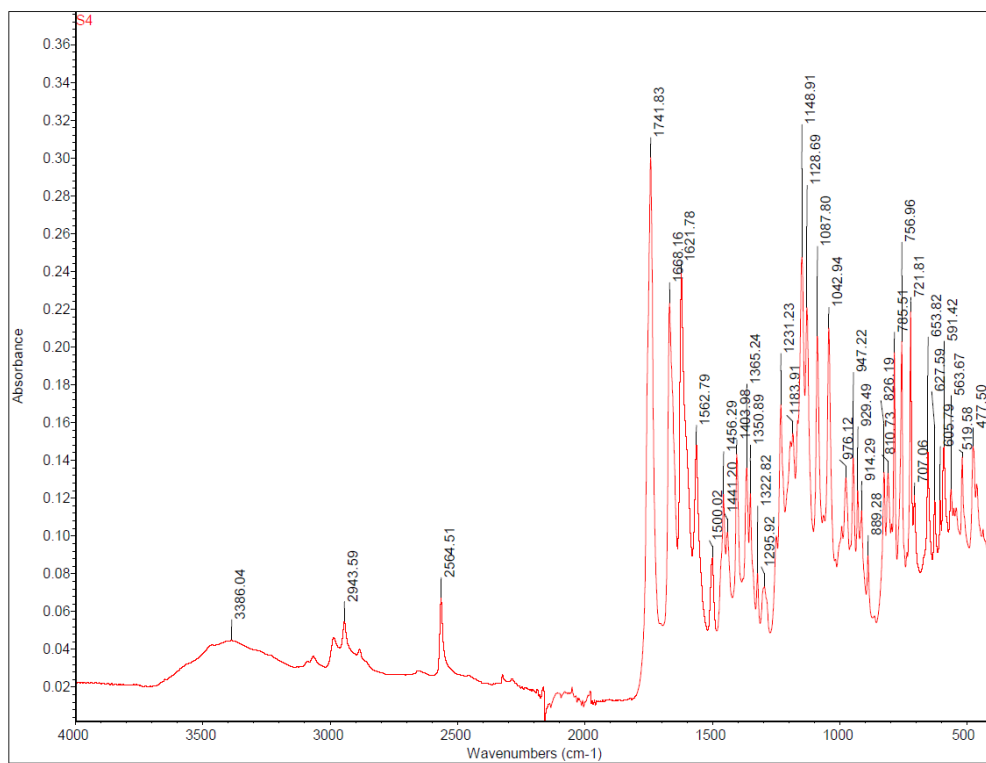

Figure S1. FTIR spectra of CPTSH.

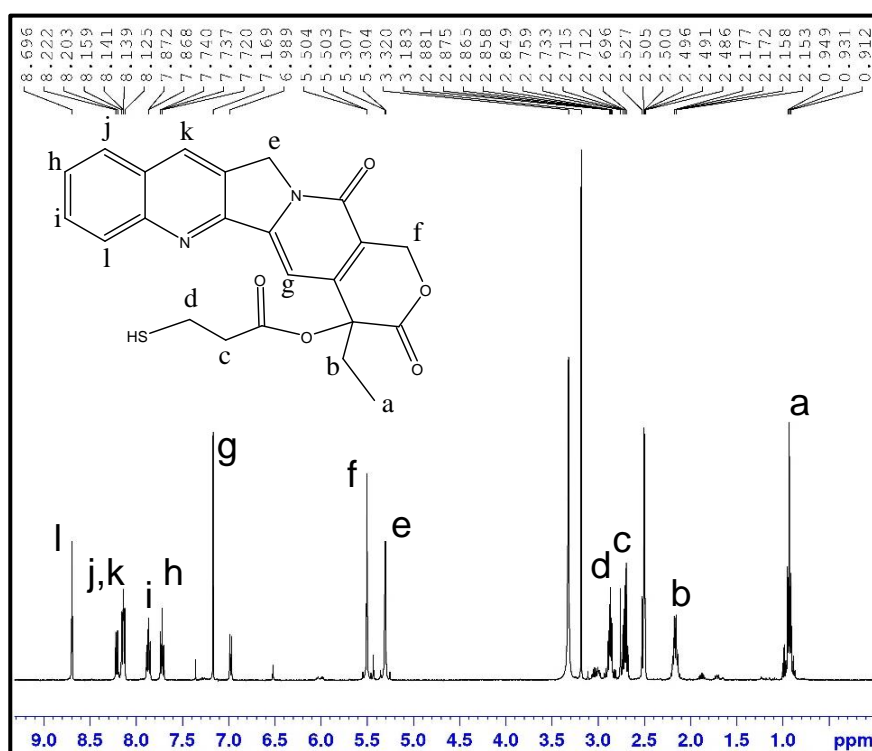

Figure S2. <sup>1</sup>H-NMR spectrum of CPTSH (in DMSO-d<sub>6</sub>, 400 MHz).

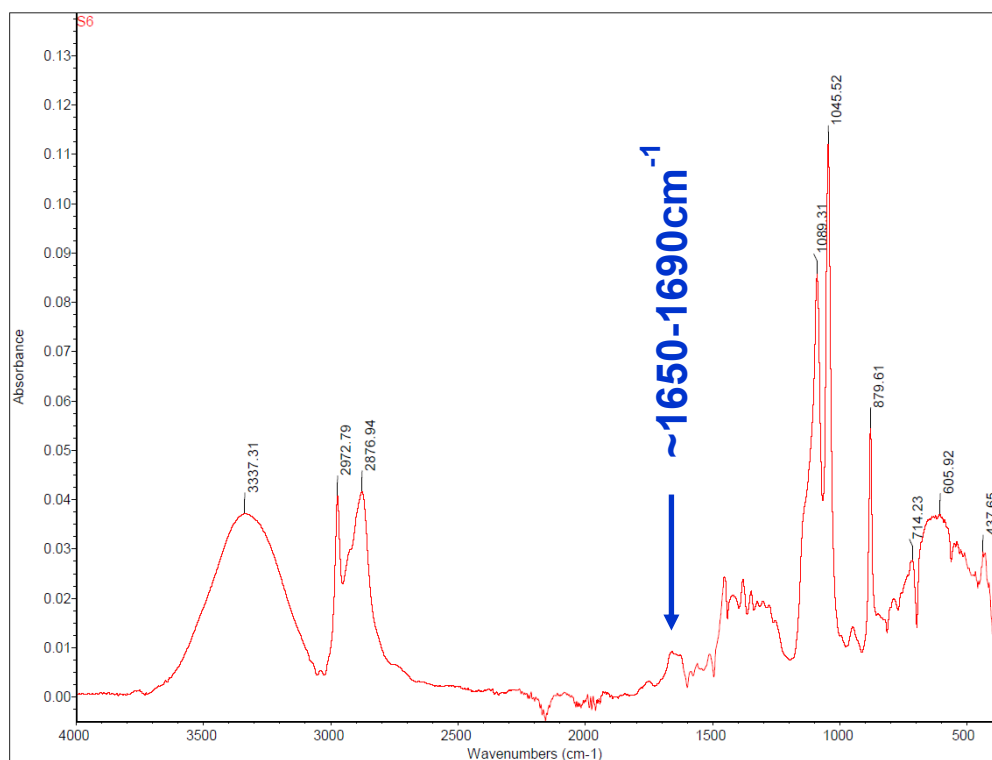

**Figure S3.** FTIR of dual drug (CPT and CUR) conjugated PEG-based polymer, CPT-S-S-PEG-CUR.

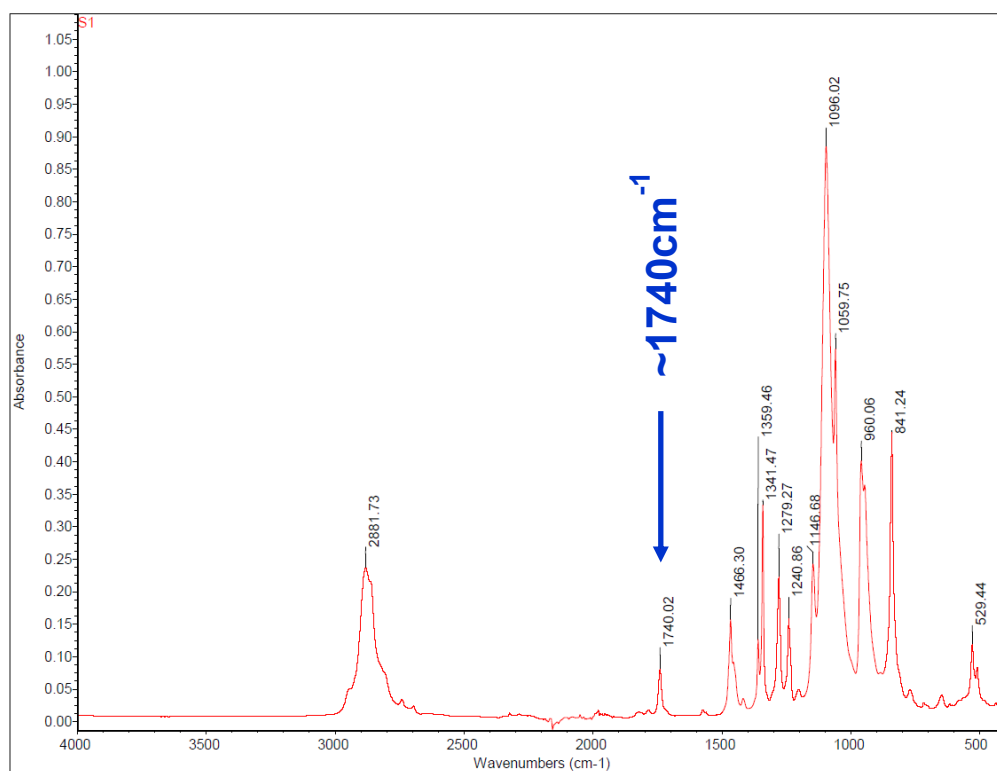

**Figure S4.** FTIR spectra of starting material OPSS-PEG-SCM.

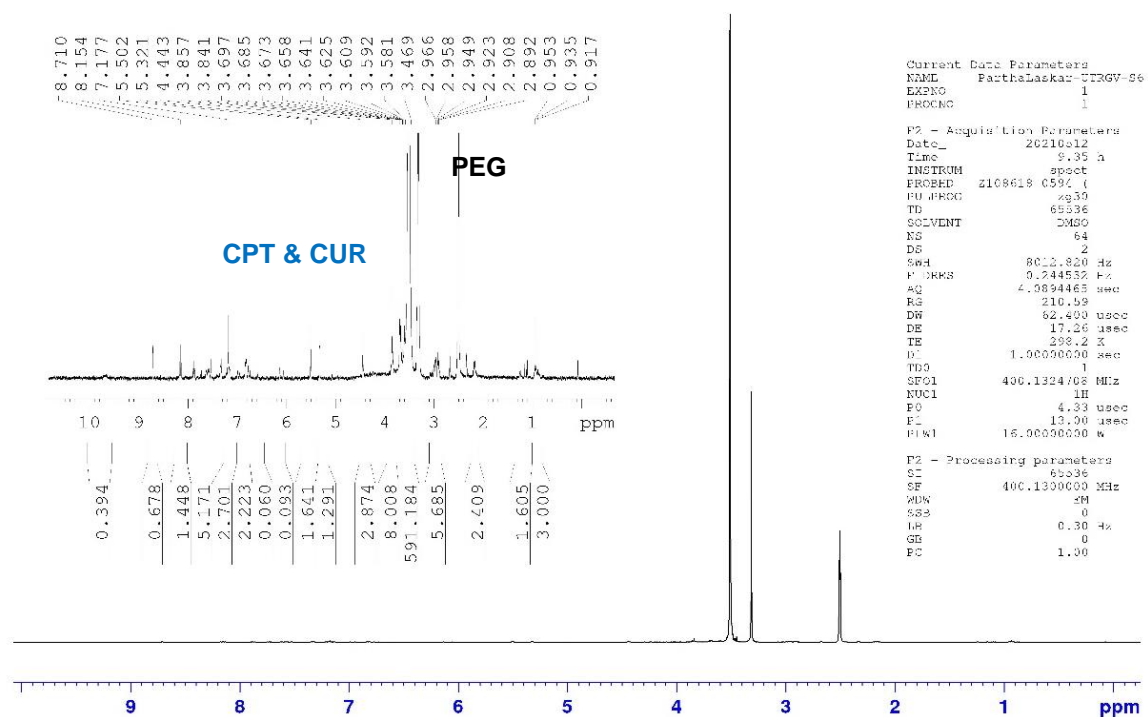

**Figure S5.**  $^1\text{H}$ -NMR spectrum of dual drug (CPT and CUR) conjugated PEG-based polymer CPT-S-S-PEG-CUR (in DMSO- $d_6$ , 400 MHz).

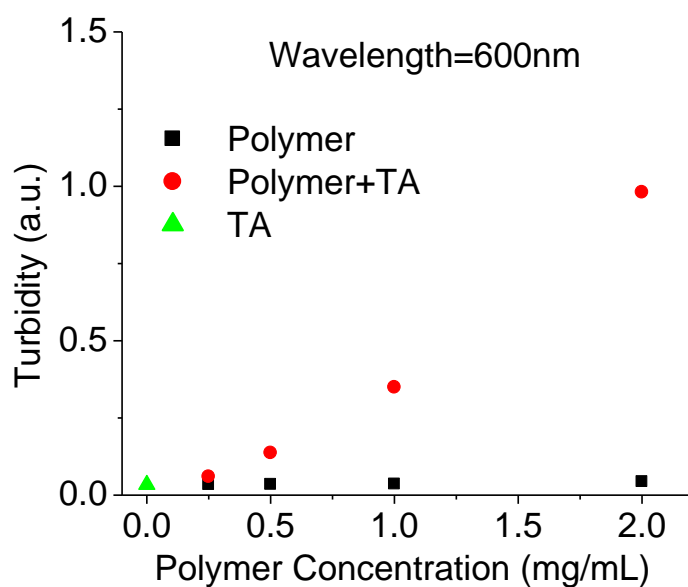

**Figure S6.** Turbidity (wavelength=600 nm) of only TA solution (5 mg/mL) and CPT-S-S-PEG-CUR solution (0.25, 0.5, 1.0, and 2.0 mg/mL) in water in absence and presence of TA (5 mg/mL).

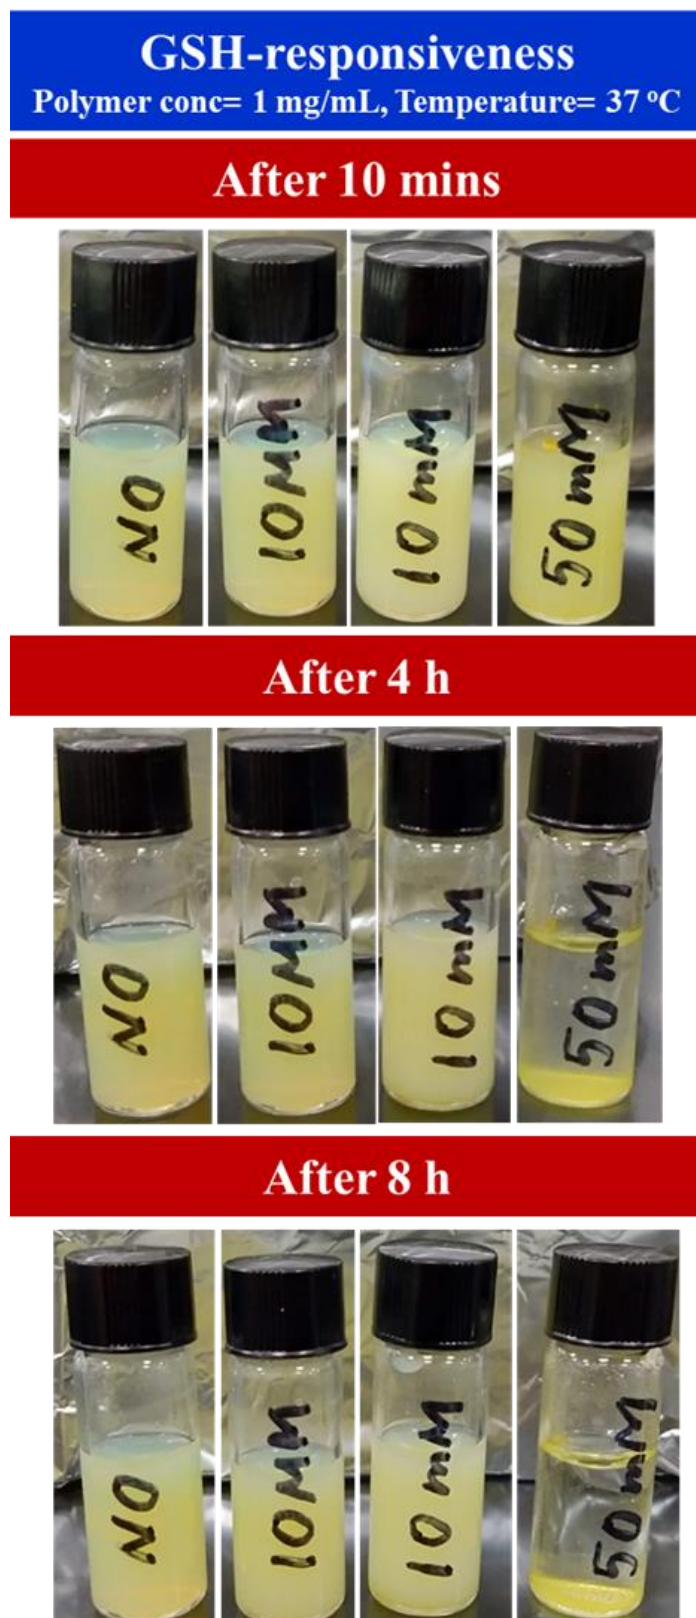

**Figure S7.** Photographs of polymer (1 mg/mL)-TA nanoassemblies in absence and presence of various GSH concentration (10  $\mu$ M, 10 mM, and 50 mM) in water at 37 °C.

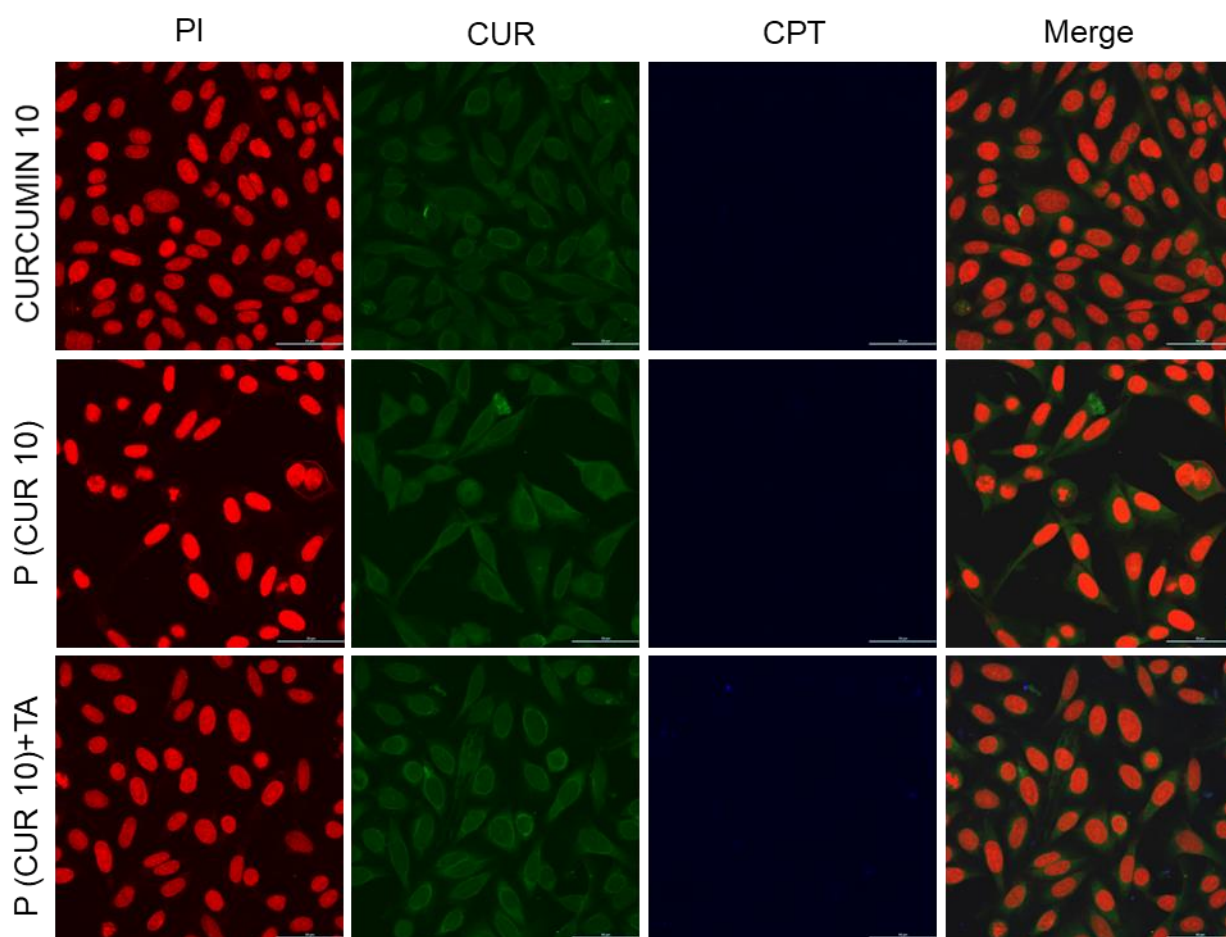

**Figure S8.** Cellular uptake of only drug CUR, and polymer CUR-PEG-S-S-CPT in absence and presence of TA by AsPC1 pancreatic cancer at 10 $\mu$ M CUR-equivalent concentrations after 4h of incubation (magnification:  $\times 40$ , Zoom: 2.08, scale bar: 50  $\mu$ m).

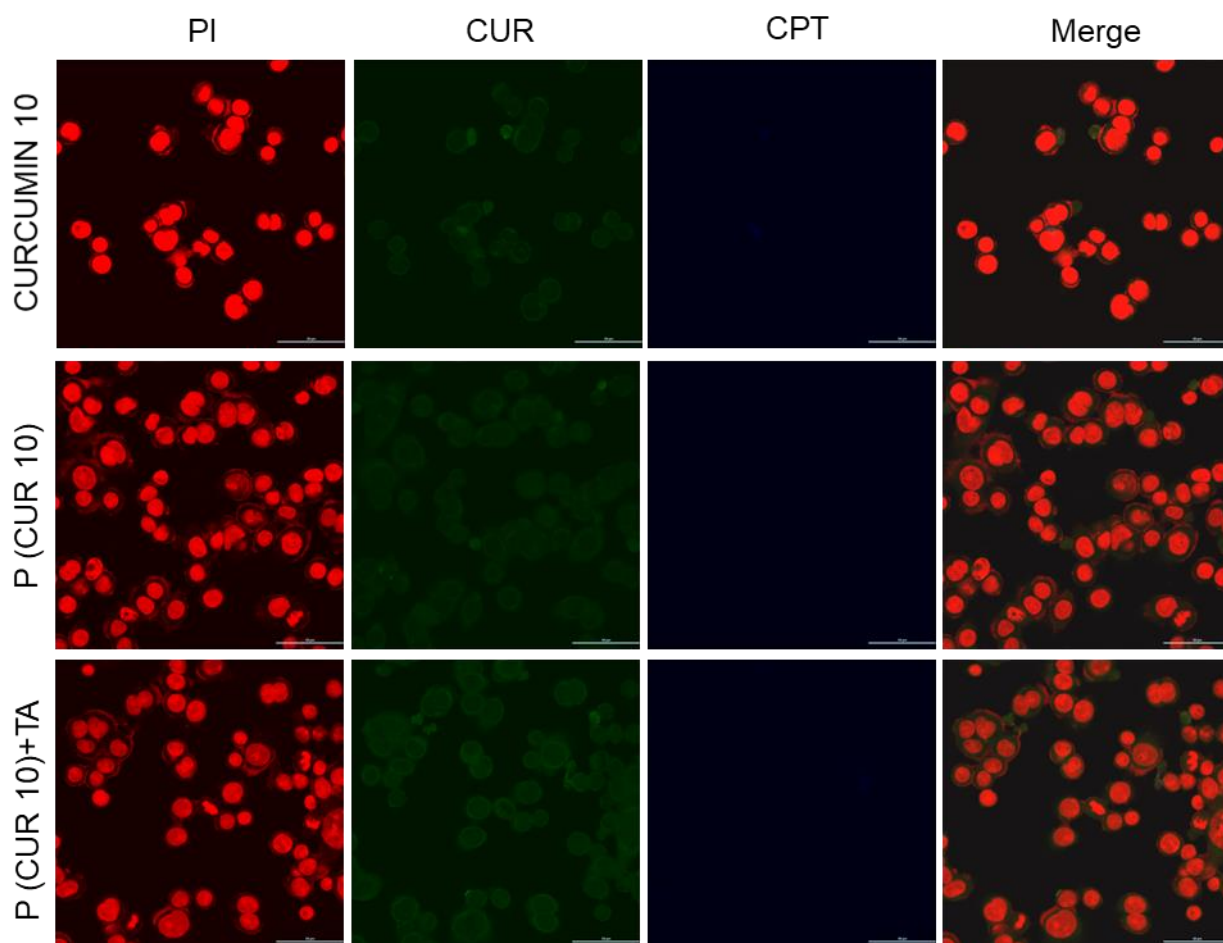

**Figure S9.** Cellular uptake of only drug CUR, and polymer CUR-PEG-S-S-CPT in absence and presence of TA by SW480 colon cancer cell at 10 $\mu$ M CUR-equivalent concentrations after 4h of incubation (magnification:  $\times 40$ , Zoom: 2.08, scale bar: 50  $\mu$ m).



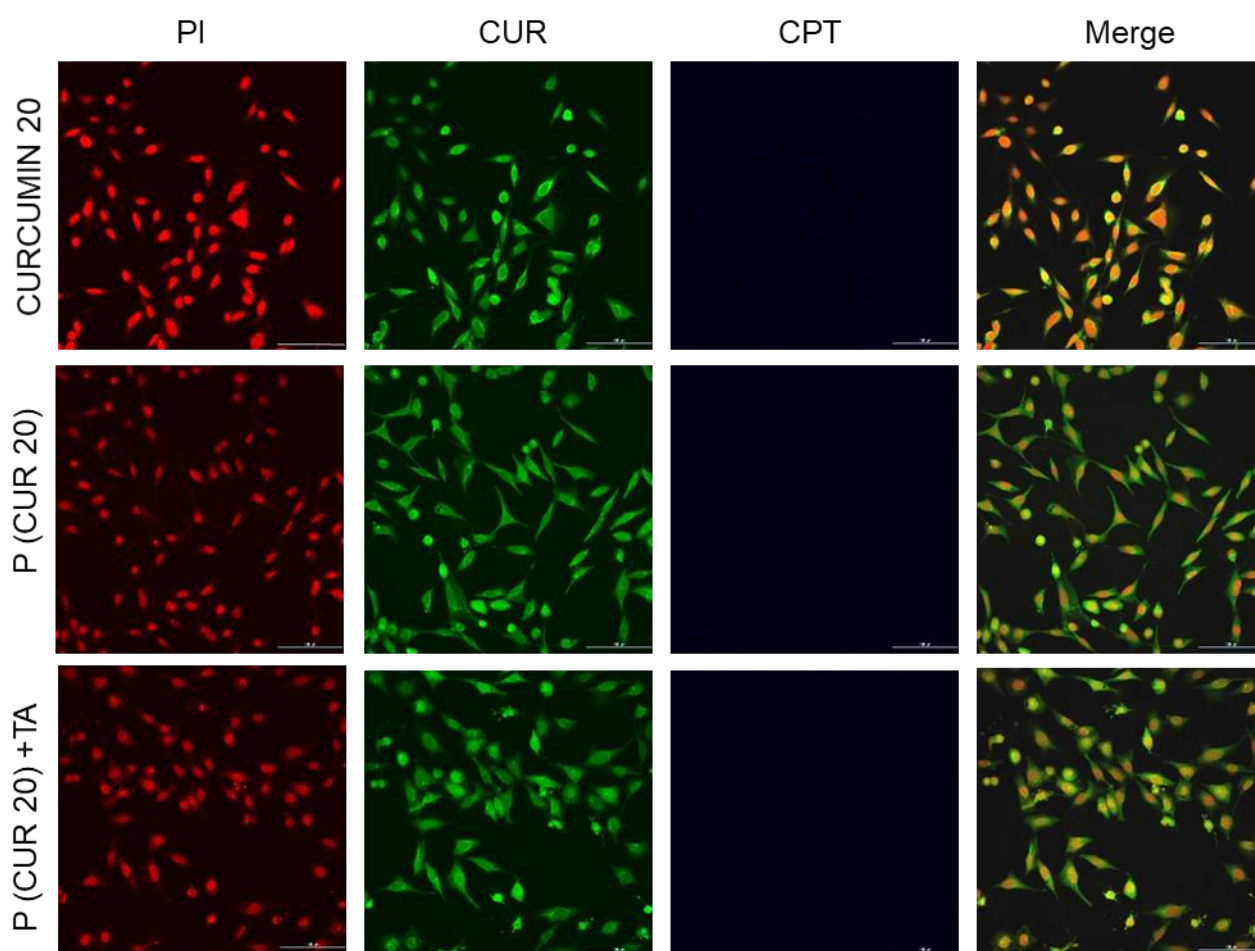

**Figure S10.** Cellular uptake of only drug CUR, and polymer CUR-PEG-S-S-CPT in absence and presence of TA by AsPC1 pancreatic cancer at 20 $\mu$ M CUR-equivalent concentrations after 12h of incubation (magnification:  $\times 40$ , scale bar: 100  $\mu$ m).



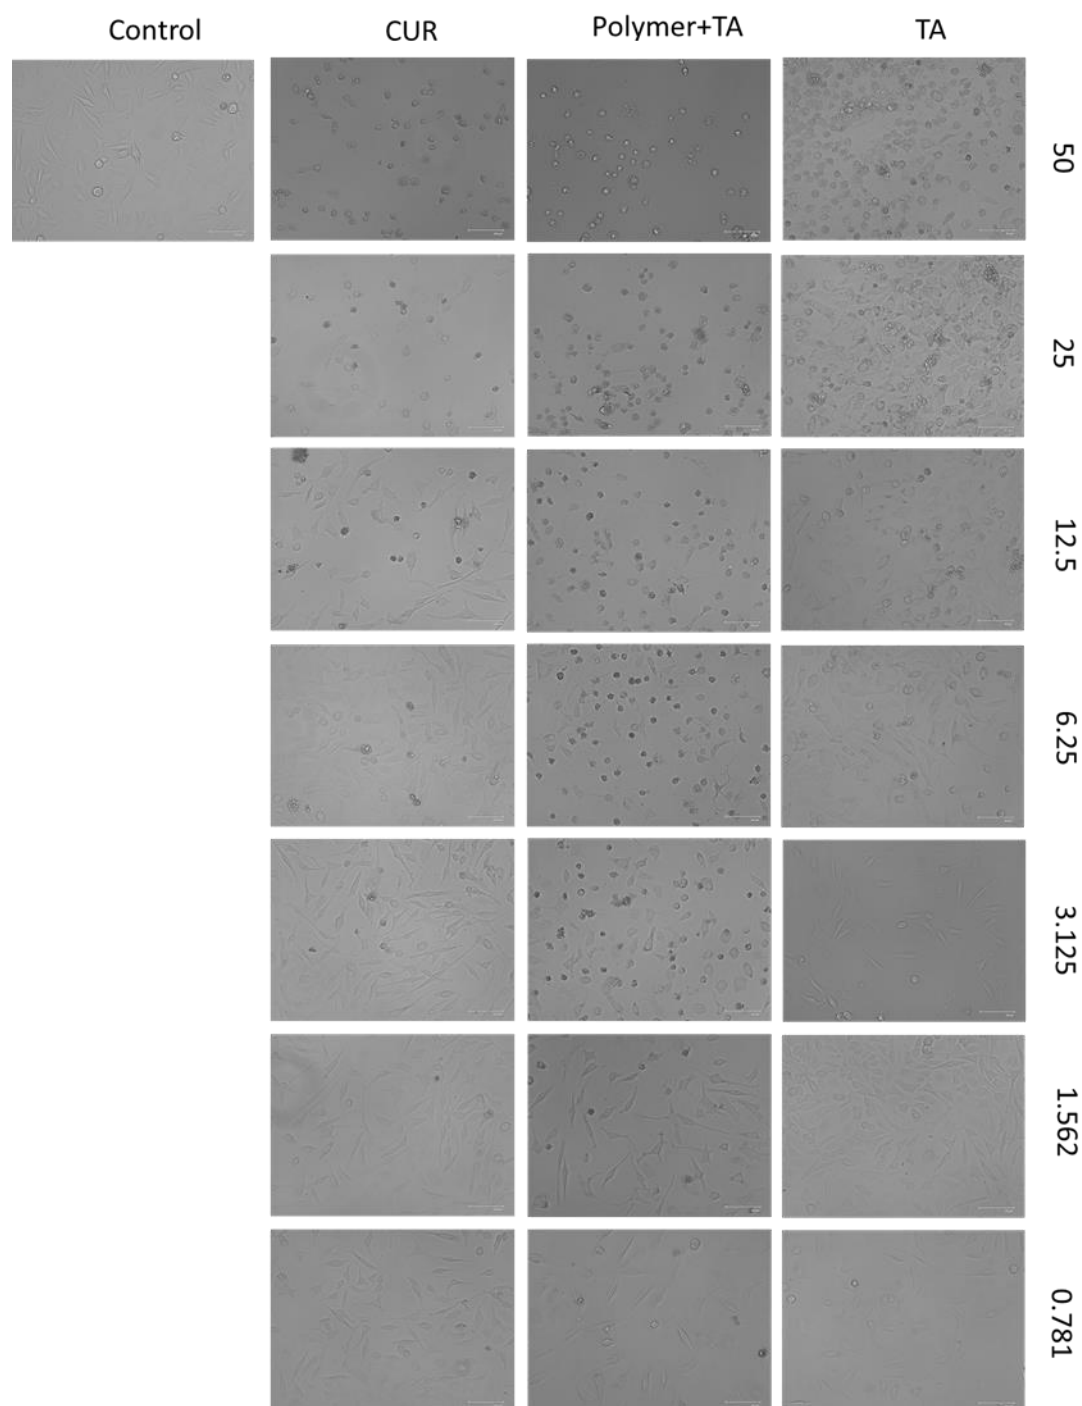

**Figure S11.** Images of the AsPC1 cells treated with the CUR, Polymer (CUR equivalent) +TA, and TA (Polymer+TA equivalent) after 48 h.

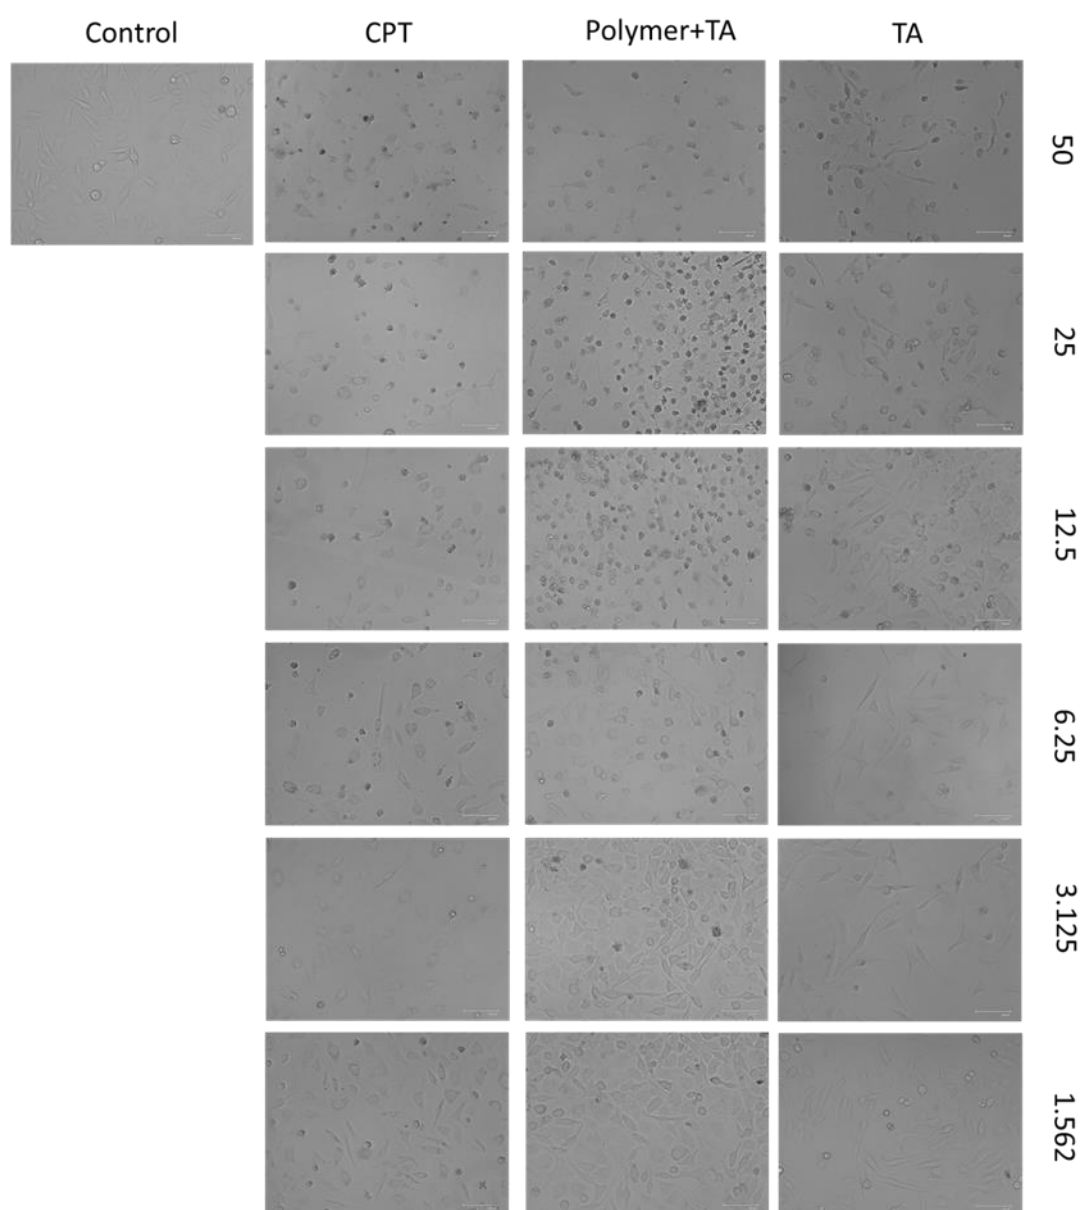

**Figure S12.** Images of the AsPC1 cells treated with the CPT, Polymer (CPT equivalent) +TA, and TA (Polymer+TA equivalent) after 48 h.

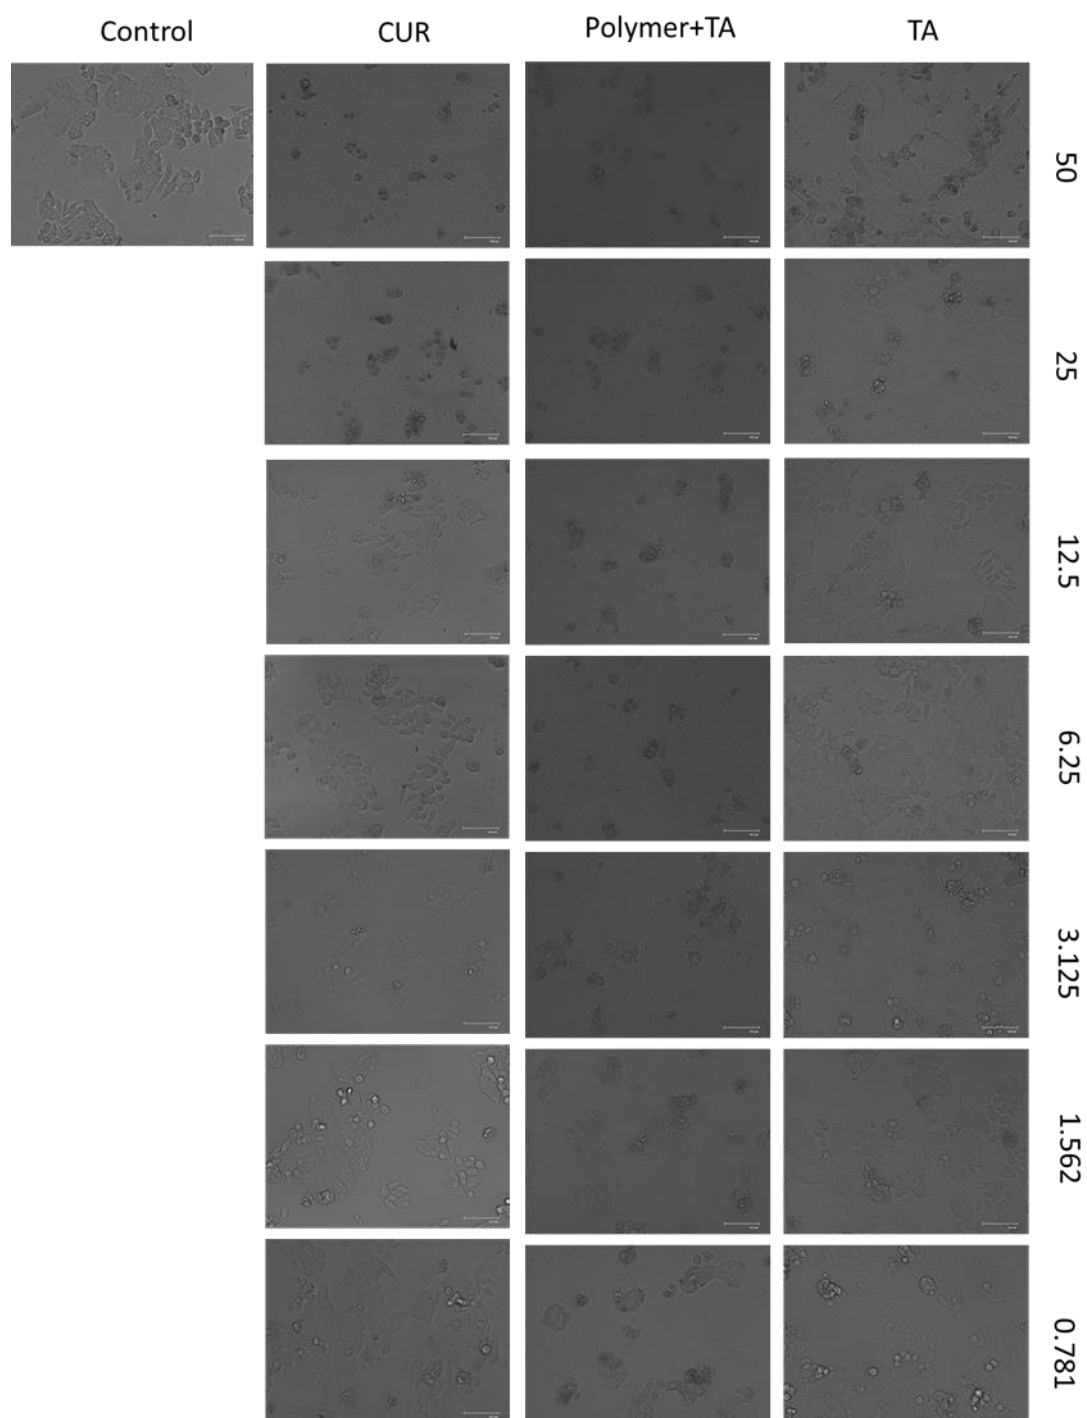

**Figure S13.** Images of the SW480 cells treated with the CUR, Polymer (CUR equivalent) +TA, and TA (Polymer+TA equivalent) after 48 h.

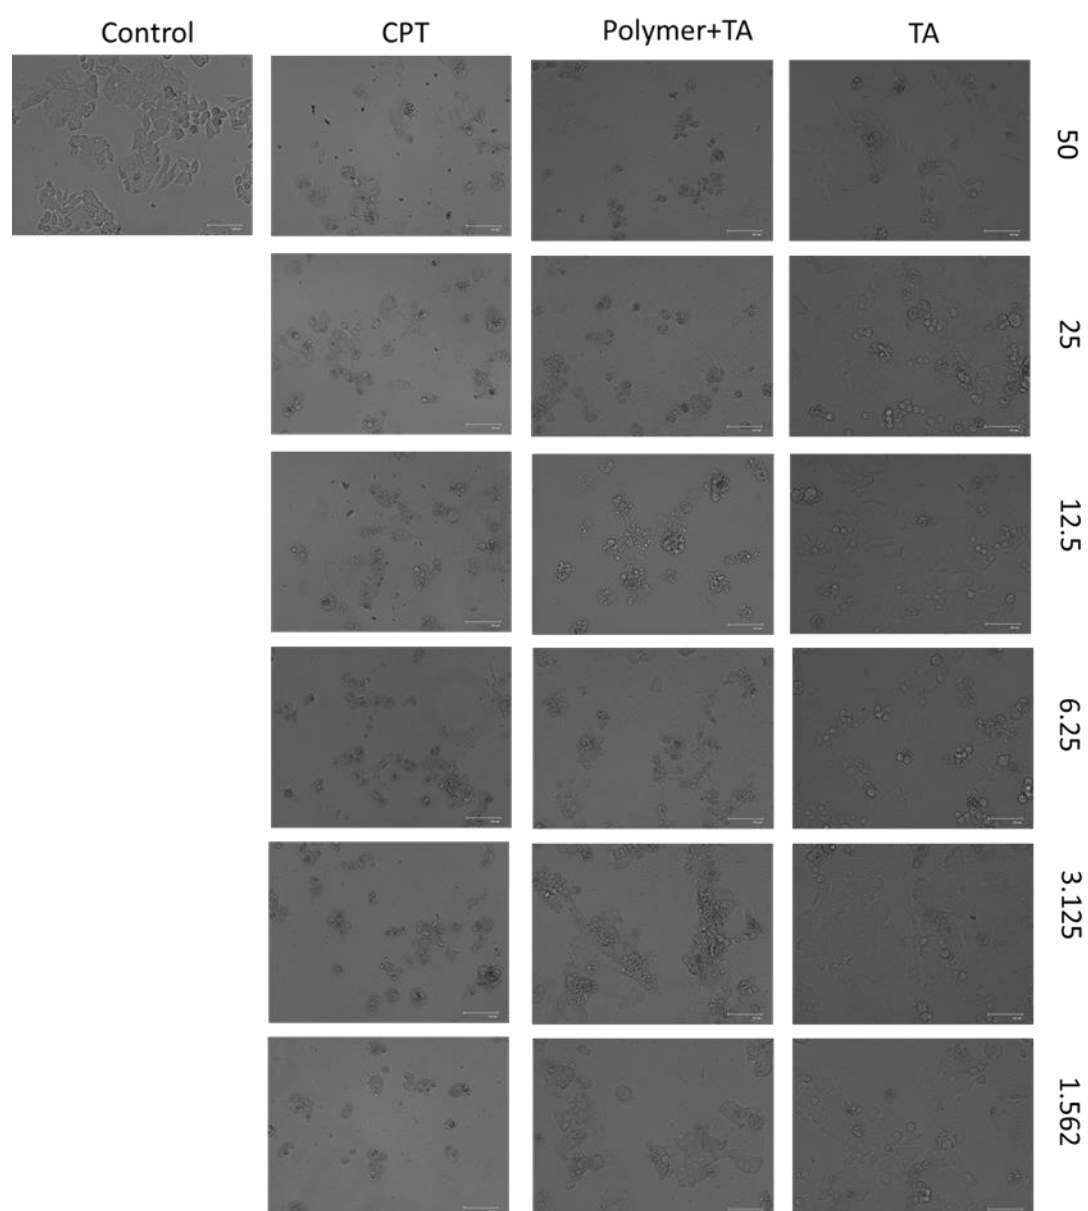

**Figure S14.** Images of the SW480 cells treated with the CPT, Polymer (CPT equivalent) +TA, and TA (Polymer+TA equivalent) after 48 h.

**A**

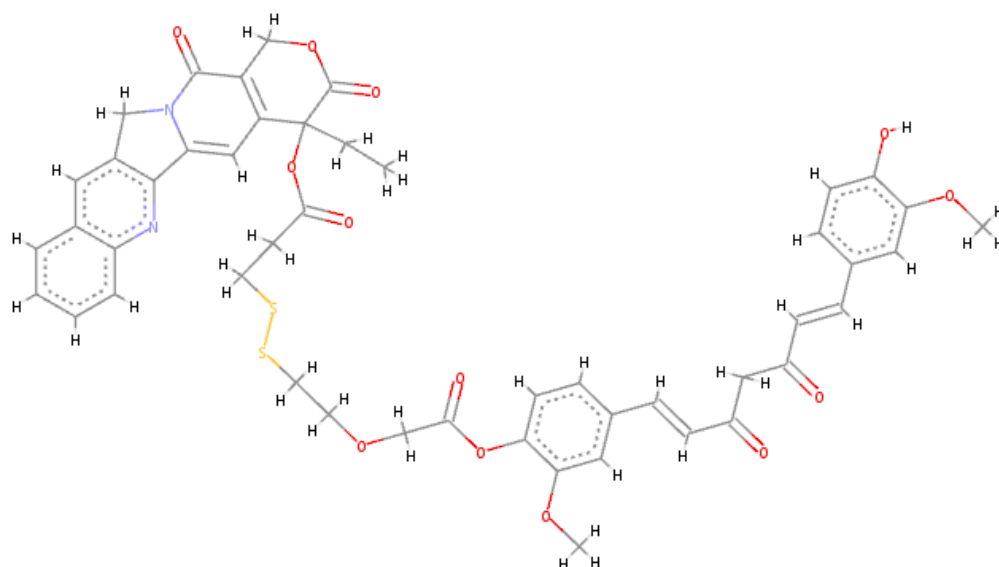

**B Physical Properties of Test Compound:**

Molecular formula:  $C_{48}H_{44}N_2O_{13}S_2$

Molecular Weight: 920.99856

ALogP: 6.564

Rotatable Bonds: 22

Acceptors: 16

Donors: 1

**Figure S15.** 2D chemical representative diagram (A) and physical properties (B) of test compound.
